# Supplementary material
Source: PubMed Central journal article supplement (PMC3964078)
Supplement: 1317667111_pnas.201317667SI.pdf [file 1317667111_pnas.201317667SI.pdf]

# Supporting Information

Brandalise and Gerber 10.1073/pnas.1317667111

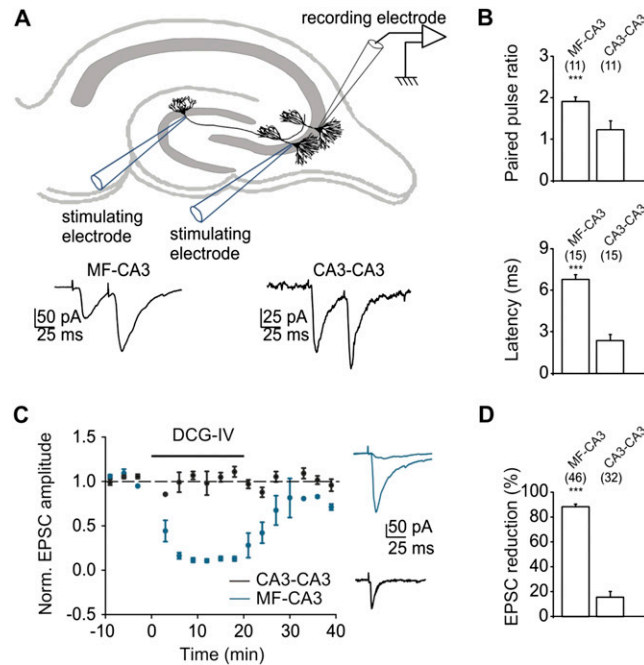

**Fig. S1.** Criteria for differentiating between synaptic responses evoked by mossy fibers and CA3 recurrent fibers. (A) Schematic of recording configuration. (Insets) Representative current traces evoked by paired-pulse stimulation with a 50-ms interval. (B) Pooled data. Mossy fiber stimulation always resulted in paired-pulse facilitation ( $1.96 \pm 0.3$ ;  $P < 0.001$ ), whereas CA3 recurrent fiber stimulation induced either paired-pulse facilitation or depression ( $1.2 \pm 0.2$ ;  $P = 0.15$ ) (1). In addition, the latency of evoked responses is longer when stimulating mossy fibers ( $6.8 \pm 0.3$  ms;  $P < 0.001$ ) (2) versus CA3 recurrent fibers ( $2.3 \pm 0.4$  ms;  $P < 0.001$ ) (3). (C) DCG-IV ( $2 \mu\text{M}$ ), an mGlu2 agonist that blocks glutamate release from mossy fiber but not CA3 pyramidal cell terminals (4), reduced mossy fiber responses by  $88.2 \pm 2.1\%$  ( $P < 0.001$ ) and CA3 responses by  $14.6 \pm 5\%$  ( $P > 0.74$ ). (D) Pooled data for DCG-IV experiments.

- Salin PA, Scanziani M, Malenka RC, Nicoll RA (1996) Distinct short-term plasticity at two excitatory synapses in the hippocampus. *Proc Natl Acad Sci USA* 93(23):13304–13309.
- Mori M, Abegg MH, Gähwiler BH, Gerber U (2004) A frequency-dependent switch from inhibition to excitation in a hippocampal unitary circuit. *Nature* 431(7007):453–456.
- Debanne D, Guérineau NC, Gähwiler BH, Thompson SM (1995) Physiology and pharmacology of unitary synaptic connections between pairs of cells in areas CA3 and CA1 of rat hippocampal slice cultures. *J Neurophysiol* 73(3):1282–1294.
- Kamiya H, Shinzaki H, Yamamoto C (1996) Activation of metabotropic glutamate receptor type 2/3 suppresses transmission at rat hippocampal mossy fibre synapses. *J Physiol* 493(Pt 2): 447–455.





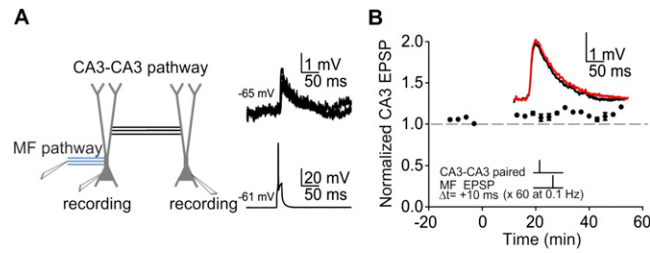

**Fig. 56.** (A) Activation of a single CA3 recurrent axon by recording from two synaptically connected CA3 pyramidal cells. (B) Repetitive pairing (60 times at 0.1 Hz) of the CA3 recurrent response evoked by stimulating a single axon, followed after 10 ms by a mossy fiber-evoked subthreshold response, did not result in synaptic potentiation ( $n = 4$ ).

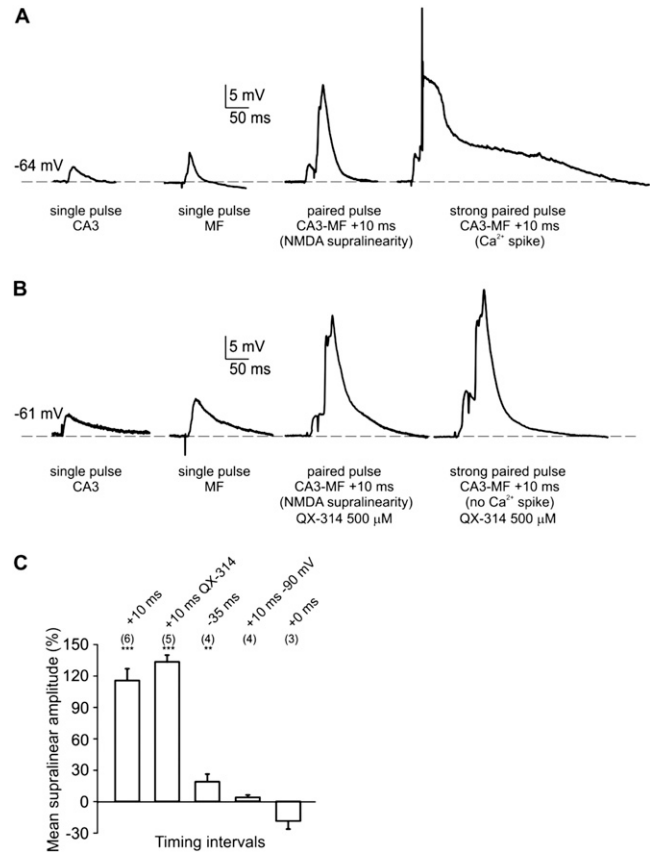

**Fig. 57.** Characterization of supralinear responses. (A) The supralinear summation of synaptic responses does not require calcium spikes. A dendritic recording from the cell shown in Fig. 3B reveals that a much stronger stimulation than that needed to induce an NMDA spike is required to evoke a calcium plateau response. (B) In the presence of intracellular QX-314 (500 μM), which blocks sodium channels (1) and reduces calcium currents (2), a calcium plateau no longer can be evoked, but the supralinear NMDA response is maintained. (C) Summary data illustrating the mean amplitude of supralinear events recorded in the apical dendrite under various timing and pharmacologic conditions.

1. Connors BW, Prince DA (1982) Effects of local anesthetic QX-314 on the membrane properties of hippocampal pyramidal neurons. *J Pharmacol Exp Ther* 220(3):476–481.
2. Talbot MJ, Sayer RJ (1996) Intracellular QX-314 inhibits calcium currents in hippocampal CA1 pyramidal neurons. *J Neurophysiol* 76(3):2120–2124.
